# Supplementary material for: Template-free synthesis of 3D Nb3O7F hierarchical nanostructures and enhanced photocatalytic activities
Source: Royal Society of Chemistry journal article supplement (doi:10.1039/c2cp44326k), 2013-01-01
Supplement: c2cp44326k.pdf [file c2cp44326k.pdf]

Supporting Information

**Template Free Synthesis of 3D Nb<sub>3</sub>O<sub>7</sub>F Hierarchical Nanostructures and Enhanced Photocatalytic Activities**

**Zheng Wang, Jungang Hou, Chao Yang, Shuqiang Jiao, Kai Huang and Hongmin Zhu\***

*State Key Laboratory of Advanced Metallurgy,*

*School of Metallurgical and Ecological Engineering,*

*University of Science and Technology Beijing, Beijing, 100083, P. R. China*

E-mail: [hzhu@ustb.edu.cn](mailto:hzhu@ustb.edu.cn)

---

## Additional Results

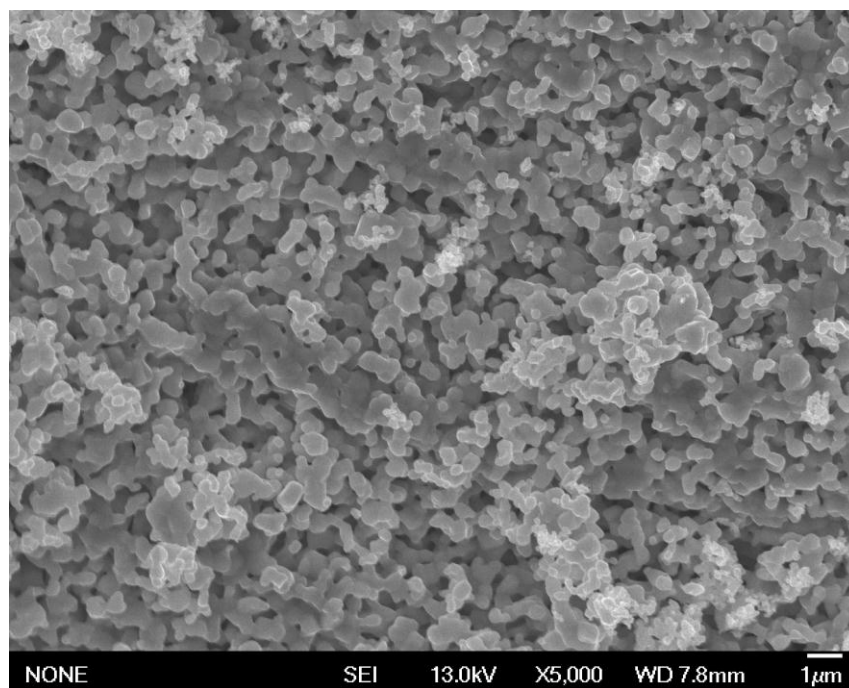

**Fig. S1.** SEM image of Nb powders.

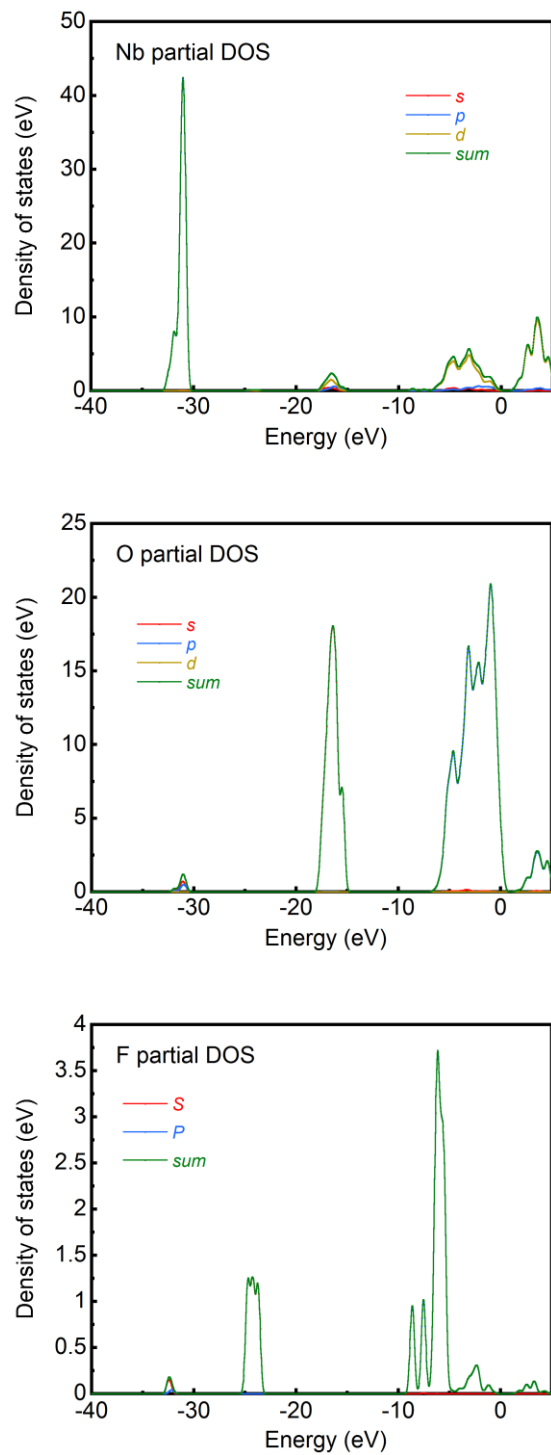

**Fig. S2.** Calculated total and partial density of states of Nb, O and F in Nb<sub>3</sub>O<sub>7</sub>F architectures.

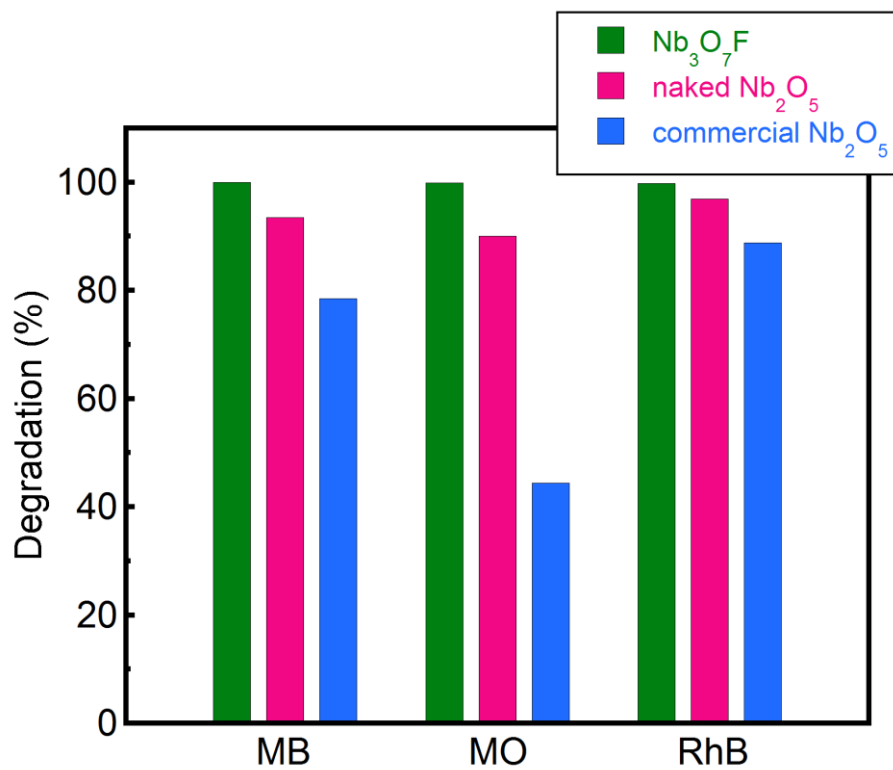

**Fig. S3.** Comparison of photocatalytic degradation of MB, MO and RhB over Nb<sub>3</sub>O<sub>7</sub>F, naked Nb<sub>2</sub>O<sub>5</sub> and commercial Nb<sub>2</sub>O<sub>5</sub> after 2 hours light irradiation.

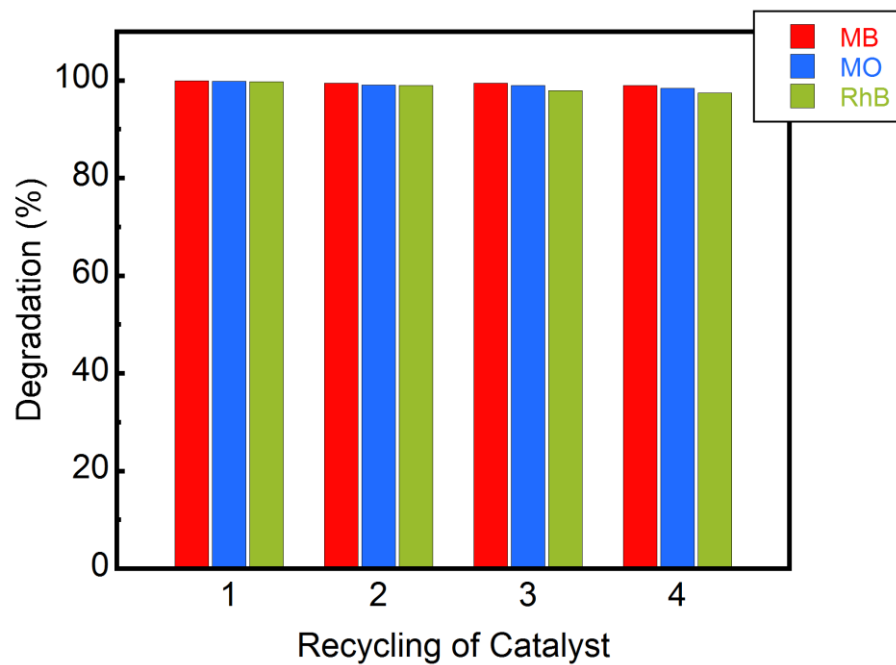

**Fig. S4.** Cycling runs in MB, MO, and RhB degradation with  $\text{Nb}_3\text{O}_7\text{F}$  architectures as photocatalyst.
